# Supplementary material
Source: Elsevier journal article supplement (https://rcastoragev2.blob.core.windows.net/24dd9282433df81216fa041de3779cb2/mmc1.pdf)
Supplement: mmc1 [file mmc1.pdf]

## SUPPLEMENTARY FIGURE METHODS AND LEGENDS

### Methods:

**DC stimulation.** Purified DC subsets were stimulated overnight with 1µg/ml lipopolysaccharide. Harvested supernatants were analysed for cytokine secretion via cytometric bead array on a FACS Array.

### Figures:

#### **Supplementary Figure 1: Alteration of RA function does not rescue the enhanced Treg inducing abilities of CD103+ mLN DCs lacking $\alpha\beta8$ integrin.**

CD103<sup>±</sup> DCs isolated from the mLN of control or *Itgb8* (*CD11c-Cre*) mice were cultured with CD4<sup>+</sup> Foxp3<sup>GFP</sup><sup>-</sup> T-cells plus anti-CD3 antibody without addition of exogenous active TGFβ, in the presence of **(A)** 100nM RA and/or 40µg/ml anti-TGFβ antibody or **(B)** 1µM of RA inhibitors and/or 40µg/ml anti-TGFβ antibody. Cells were analysed by flow cytometry after 5 days for cells that were Foxp3<sup>GFP</sup><sup>+</sup>. Data is representative of 2 independent experiments. N.S. = not significant.

**Supplementary Figure 2: Lack of  $\alpha\beta8$  integrin expression by intestinal DCs does not alter their ability to produce active retinoic acid. (A)** RNA was purified from control or  $\alpha\beta8$ <sup>-/-</sup> CD103<sup>±</sup> DCs and analysed for *aldh1a2* expression by quantitative RT-PCR. Data shown is representative of 2 independent experiments **(B)** CD103<sup>±</sup> DCs from control or *Itgb8* (*CD11c-Cre*) mice mLN were cultured with CD4<sup>+</sup> Foxp3<sup>GFP</sup><sup>-</sup> T-cells in the presence of anti-CD3 Ab and the absence of exogenous active TGFβ. Expression of the RA-inducible receptor integrin  $\alpha4\beta7$  and Treg marker Foxp3 on CD4<sup>+</sup> T-cells was analysed by flow cytometry after 5 days. Representative plots are shown from 3 independent experiments, gated on CD4<sup>+</sup> cells.

**Supplementary Figure 3: Lack of  $\alpha\text{v}\beta 8$  integrin expression by intestinal CD103+ DCs does not result in a pro-inflammatory CD103- DC-like response.** Control or integrin  $\alpha\text{v}\beta 8^{-/-}$  CD103+/- DCs were incubated for 24hrs in the presence of 1 $\mu\text{g}/\text{ml}$  L.P.S. for 24hrs. Cytokines were detected in supernatants via cytometric bead array analysis. Data represents means of 3 independent experiments. \* $P < .05$ .

**Supplementary Figure 4: Lack of  $\alpha\text{v}\beta 8$  integrin expression by gut DCs does not alter the levels of MT1-MMP which are comparable between CD103+/- DC subsets.** RNA was purified from control or  $\alpha\text{v}\beta 8^{-/-}$  CD103+ and CD103- DCs and analysed for MT1-MMP expression by quantitative RT-PCR. Data from 2 independent experiments.

**Supplementary Figure 5: Integrin  $\alpha\text{v}\beta 8$ -mediated TGF $\beta$  activation is critical for the enhanced ability of CD103+ DCs to induce Foxp3+ Tregs in the presence of CD44<sup>high</sup> CD4+ T-cells.** Foxp3+ Treg induction assays were performed using either control or integrin  $\alpha\text{v}\beta 8^{-/-}$  CD103+/- DCs and CD4+ Foxp3<sup>GFP</sup> - T-cells including the CD44<sup>high</sup> subset at a CD44<sup>high</sup> /CD44<sup>low</sup> ratio of 1:4, in the presence of 40 $\mu\text{g}/\text{ml}$  mIgG or anti-TGF $\beta$  antibody with/without 100nM RA. Data **(A)** and representative flow cytometry plots **(B)** are representative of 2 independent experiments.

**Supplementary Table 1: Sequence of primers used to detect gene products by quantitative PCR.** Primer pairs (forward and reverse) were used to detect indicated gene products by quantitative PCR as detailed in the Materials and Methods section.

# SUPPLEMENTARY FIGURE 1

**A.**

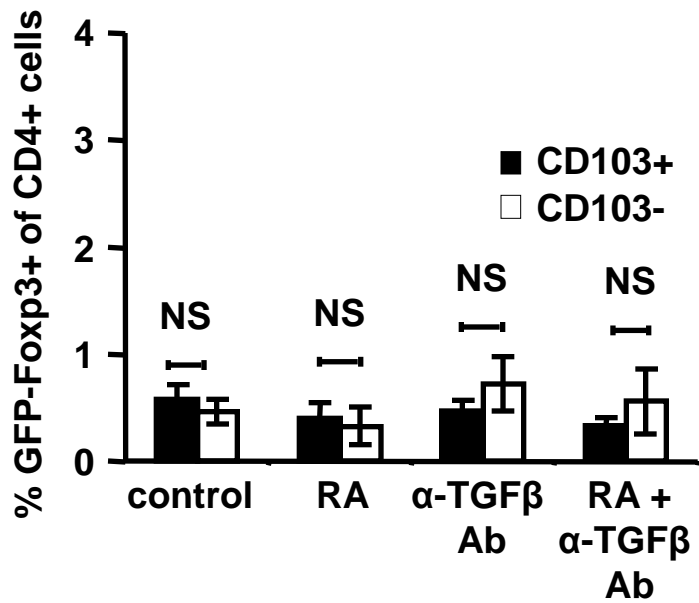

**B.**

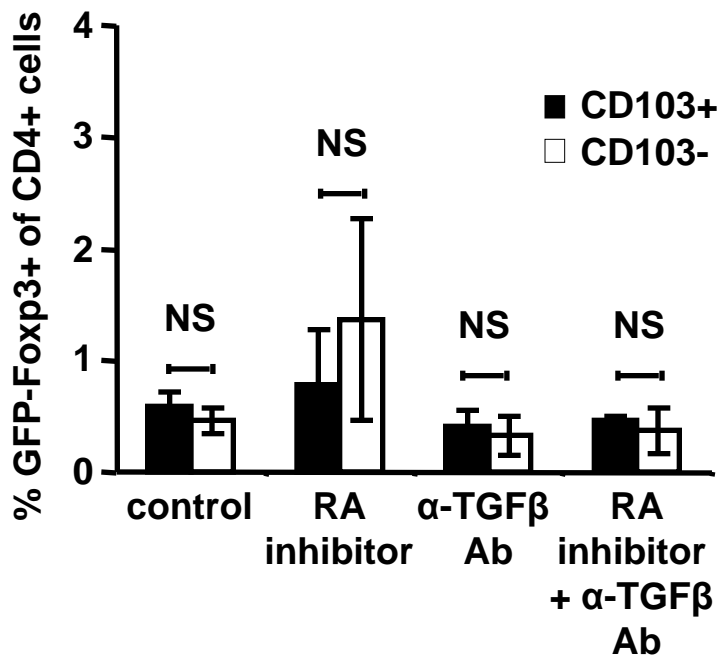

# SUPPLEMENTARY FIGURE 2

A.

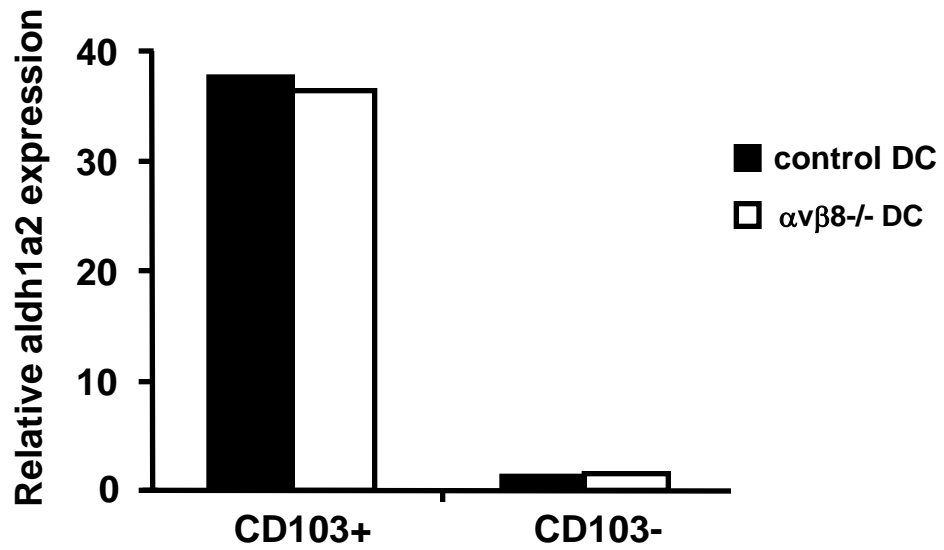

B.

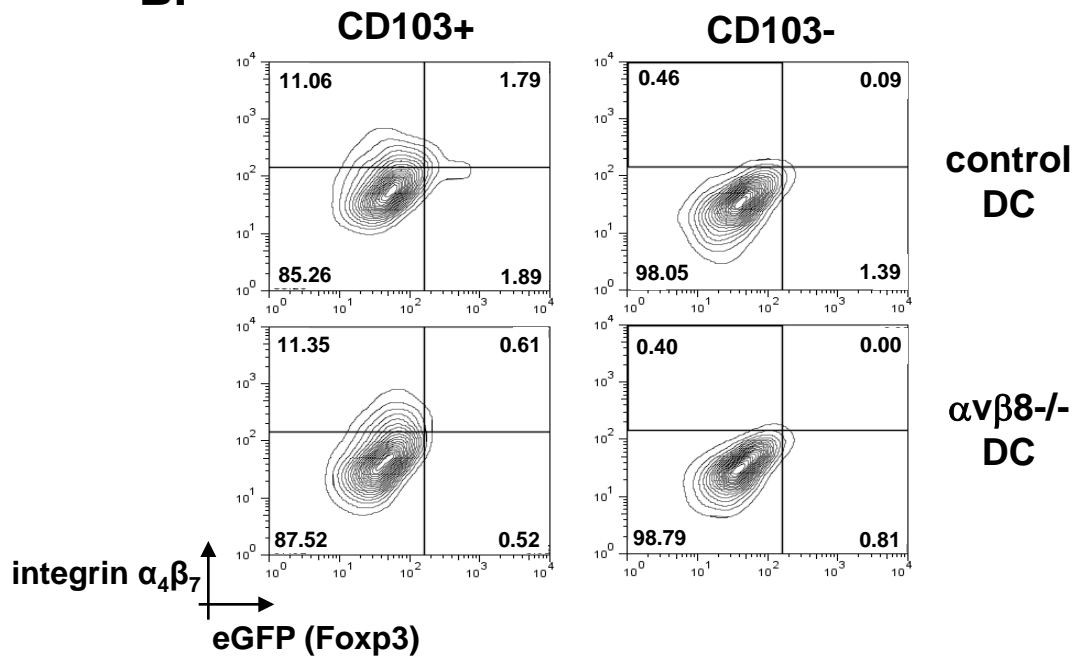

# SUPPLEMENTARY FIGURE 3

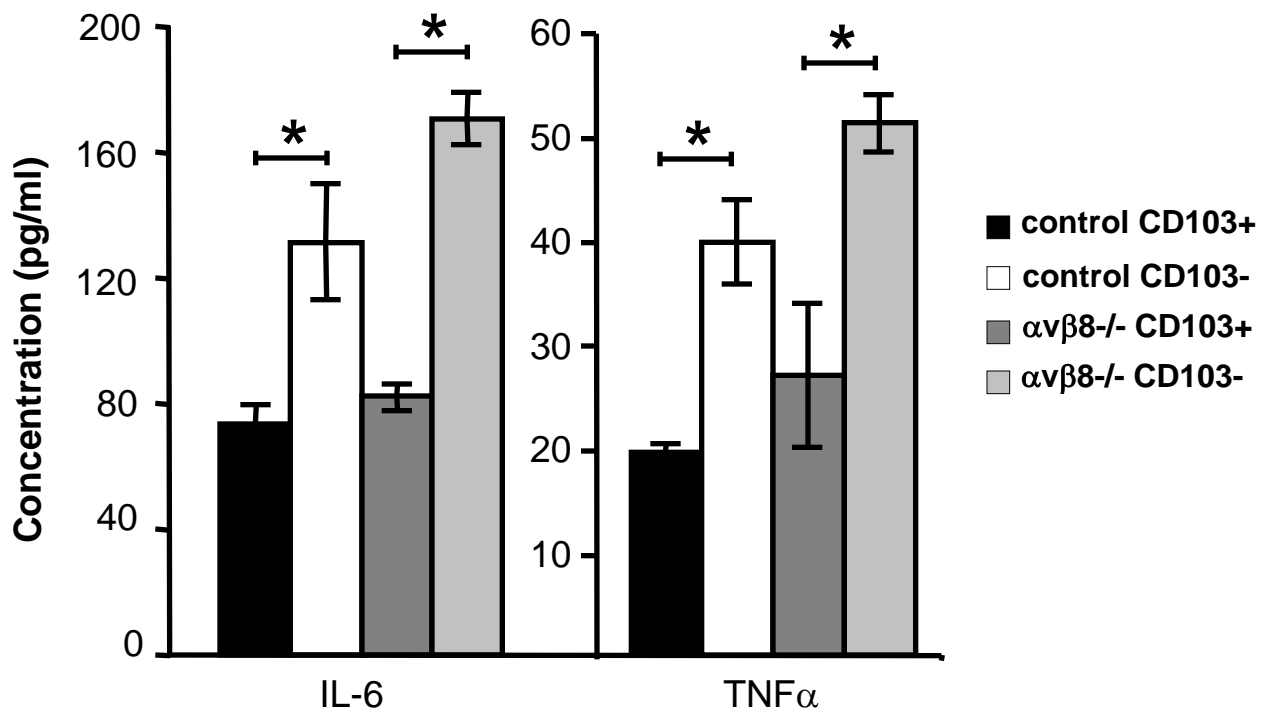

# SUPPLEMENTARY FIGURE 4

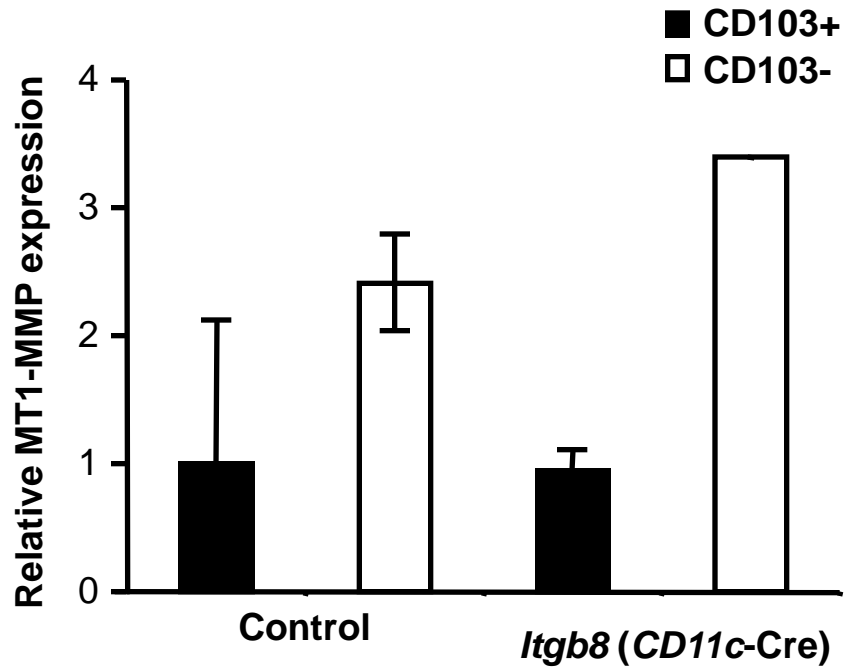

# SUPPLEMENTARY FIGURE 5

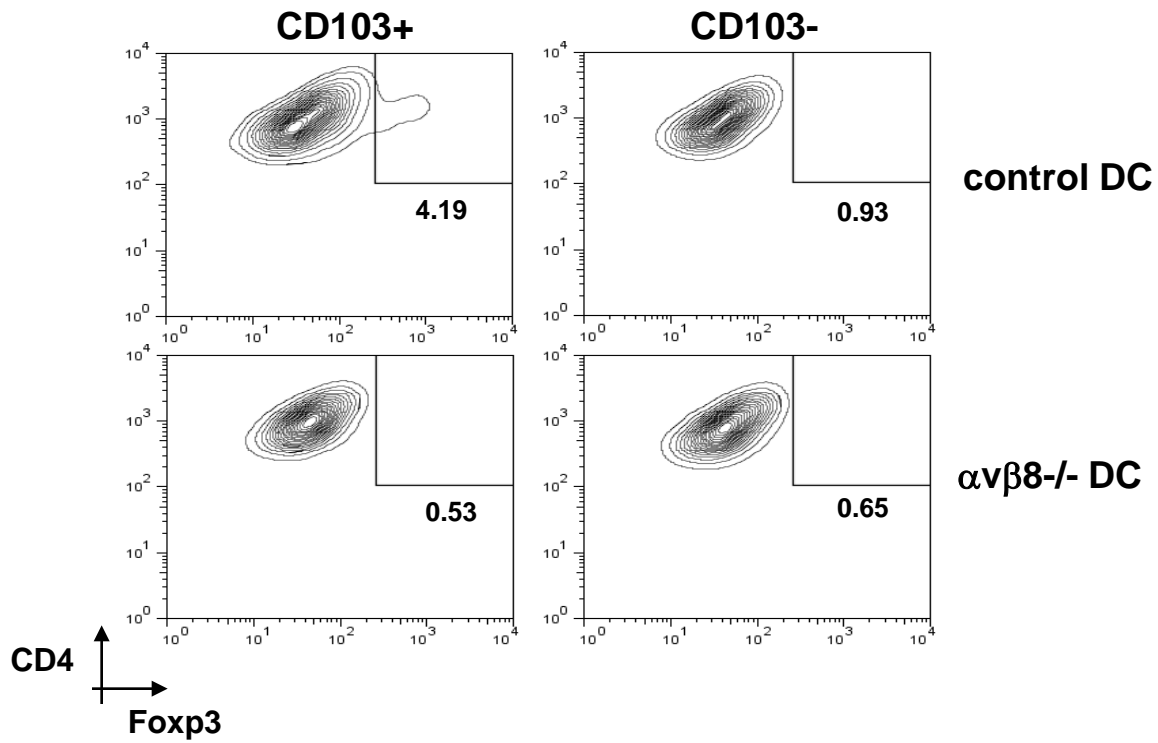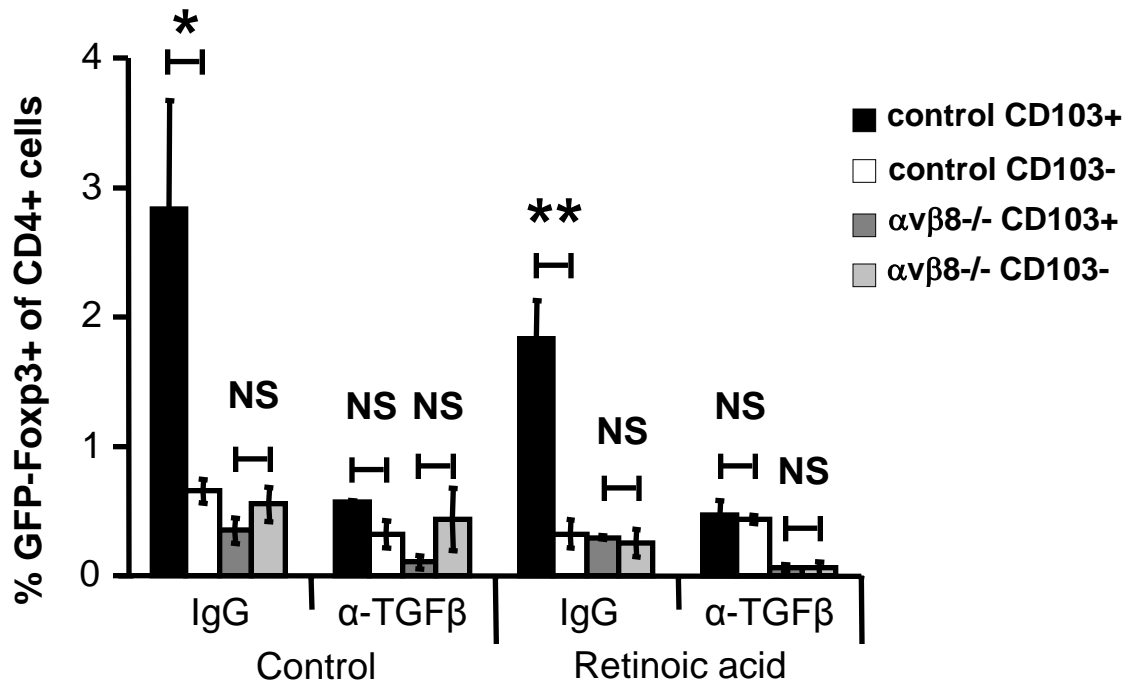

# SUPPLEMENTARY TABLE 1

| Primer                     | Sequence                  |
|----------------------------|---------------------------|
| HPRT Forward               | GCGTCGTGATTAGCGATGATGAAC  |
| HPRT Reverse               | GAGCAAGTCTTTCAGTCCTGTCCA  |
| Integrin $\beta$ 8 Forward | GGGTGTGGAAACGTGACAAGCAAT  |
| Integrin $\beta$ 8 Reverse | TCTGTGGTTCTCACACTGGCAACT  |
| aldh1a2 Forward            | TGTAATCCAGCCACAGGAGAGCAA  |
| aldh1a2 Reverse            | ACGTCCTCTTTCAGACGCATCCAT  |
| TGF $\beta$ 1 Forward      | TAAAGAGGTCACCCGCGTGCTAAT  |
| TGF $\beta$ 1 Reverse      | ACTGCTTCCCGAATGTCTGACGTA  |
| MT1-MMP Forward            | AGATCAAGGCCAATGTTCGGAGGA  |
| MT1-MMP Reverse            | AATGTGGCATACTCGCCACACCTTA |
